# Supplementary material
Source: PubMed Central journal article supplement (PMC2394707)
Supplement: halms145547-supplement.pdf [file halms145547-supplement.pdf]

## Supplementary Data

**Figure S1** ER $\alpha$  represses *de novo* synthesis of RelB. (a1) T47D cells were treated with 1  $\mu$ M ICI 182,780 (ICI) or equivalent volume of vehicle ethanol (Eth) for 48 h and WCEs (25  $\mu$ g) analyzed by immunoblotting for RelB, ER $\alpha$ , and  $\beta$ -actin. RelB levels normalized to  $\beta$ -actin in cells treated with ICI 182,780 are presented relative to cells treated with control ethanol. (a2) T47D cells were treated as above and mRNA (20  $\mu$ g) subjected to Northern blot analysis using human *RELB* cDNA as probe. Ethidium bromide staining of the gel confirmed equal loading. (a3) T47D cells were treated as above, and nuclear extracts (5  $\mu$ g) subjected to EMSA using oligonucleotides containing either NF- $\kappa$ B, AP-1 or Oct-1 elements, as probes. (a4) T47D cells were transiently transfected, in triplicate, with 0.5  $\mu$ g NF- $\kappa$ B or AP-1 element driven constructs  $\kappa$ B-Luc or TRE-CAT, respectively and 0.5  $\mu$ g SV40- $\beta$ -gal. Post-transfection (6 h), cells were treated with 1  $\mu$ M ICI 182,780 or equivalent volume of vehicle ethanol for 40 h. Luciferase and CAT activities were determined and values normalized by  $\beta$ -gal activity presented as the mean  $\pm$  S.D. from three separate experiments (with the control ethanol sample set to 1). (b) Stable Hs578T transfectants expressing either sense *RELB* (si-Con) or siRNA *RELB* (si-*RELB*) were prepared. (b1) RNA (20  $\mu$ g) was subjected to Northern blot analysis using human *RELB* cDNA as probe. Ethidium bromide staining of the gel confirmed equal loading. (b2) Nuclear extracts (25  $\mu$ g) were analyzed by immunoblotting for levels of RelB, p65 and Lamin B, as loading control. (c) WCEs were prepared from MDA-MB-231 cells transiently expressing sense *RELB* (si-Con) or siRNA *RELB* (si-*RELB*). Samples (50  $\mu$ g) were analyzed by immunoblotting for E-cadherin,  $\gamma$ -catenin ( $\gamma$ -caten), Snail, fibronectin (FN),  $\beta$ -actin, and RelB.

**Figure S2** RelB expression promotes mesenchymal phenotype via induction of Bcl-2. (a) Stable MCF-7 clones expressing either RELB or EV DNA were isolated: RELB(1), RELB(2), EV(1), and EV(2). Cells were transiently transfected, in triplicate, with 0.5  $\mu$ g  $\kappa$ B-Luc vector, and 0.5  $\mu$ g SV40- $\beta$ -gal. Post-transfection (48 h), luciferase and  $\beta$ -gal activities were determined and normalized values presented relative to EV transfection, which was set at 1 (mean  $\pm$  S.D from three separate experiments). Inset: nuclear extracts (25  $\mu$ g) from the cells, indicated below, were subjected to immunoblot analysis for RelB, p65, and Lamin B. (b) WCEs (25  $\mu$ g) from MCF-7 RELB and control cells were analyzed by immunoblotting for cyclin D1, product of an NF- $\kappa$ B target gene, and for  $\beta$ -actin. (c) ZR-75 cells were transiently transfected, in triplicate, with 1.0  $\mu$ g WT or CRE-Mutant P1 *BCL2* promoter-Luc vector, the indicated dose of p52 or RelB expression vectors, 0.5  $\mu$ g SV40- $\beta$ -gal and empty vector pcDNA3 (EV) to make a total of 3.5  $\mu$ g DNA. Post-transfection (48 h), luciferase and  $\beta$ -gal activities were determined and normalized luciferase activities presented (mean  $\pm$  S.D. from three separate experiments).

**Figure S3** RelB reduces E-cadherin expression in MCF-7 cells. The levels of E-cadherin in stable MCF-7 RELB and control cells were determined by indirect immunofluorescence microscopy using mouse anti-E-cadherin (primary) and Alexa594 anti-mouse (secondary) antibodies. Nuclei were stained with DAPI. Fluorescence microscopy was performed using a Zeiss Axiovert 200M microscope. Individual and merged images are shown. Scale bar, 100  $\mu$ m.

**Figure S4** Bcl-2 reduces E-cadherin expression in MCF-7 cells. The levels of E-cadherin in MCF-7 stable cells with either EV or full length Bcl-2 DNA were determined by indirect

immunofluorescence microscopy using mouse anti-E-cadherin (primary) and Alexa594 anti-mouse (secondary) antibodies, as in Figure S3. Scale bar, 100  $\mu$ m.

**Figure S5** Full scans of original Western blots and EMSA gel. (a) Full scans of immunoblots of ER $\alpha$  and RelB in Figure 1a top panel. ns, nonspecific band. (b) Full scans of AP-1 and NF- $\kappa$ B EMSA in Figure 1e. (c) Full scan of E-cadherin immunoblot in Figure 4i.

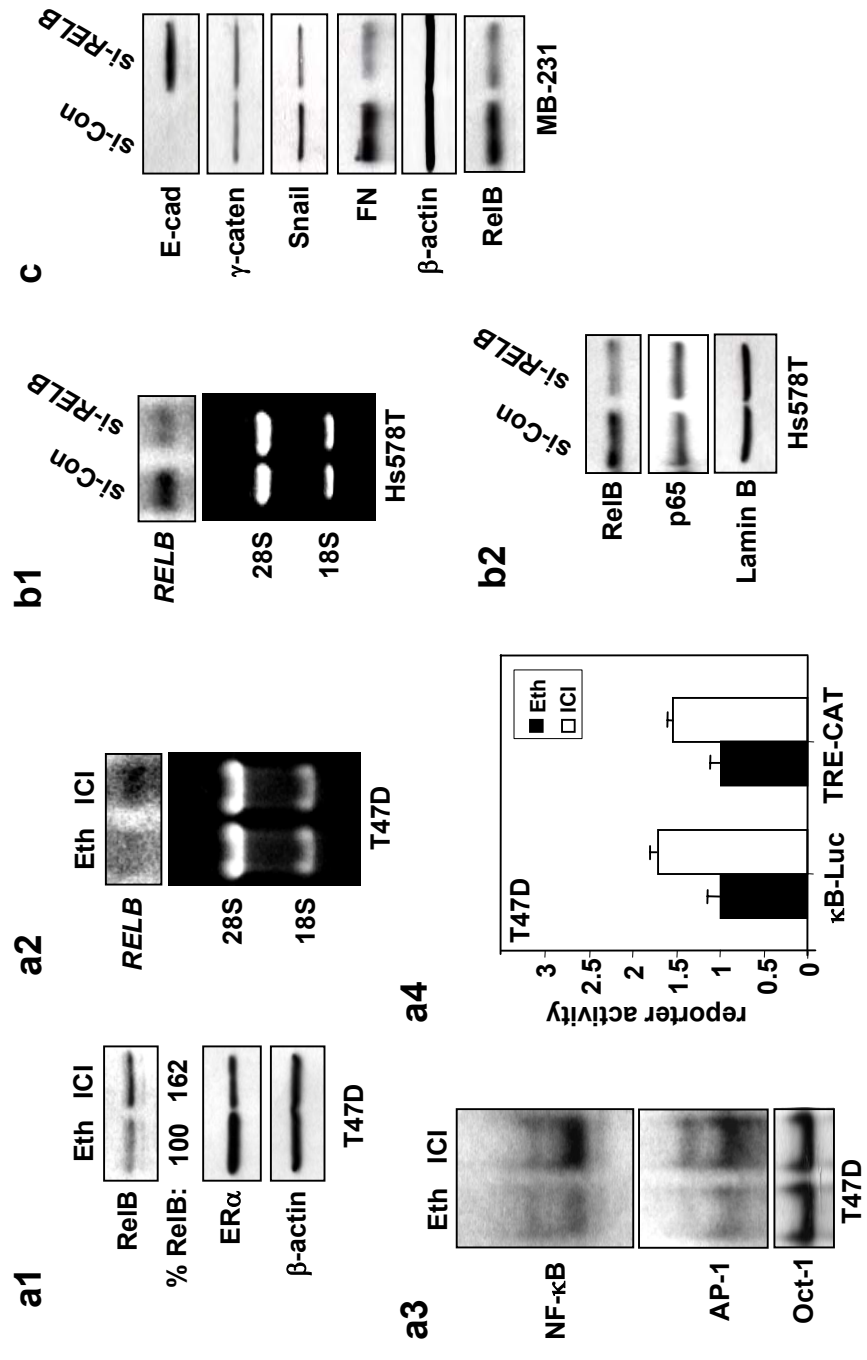

Fig S1. Wang et al.,

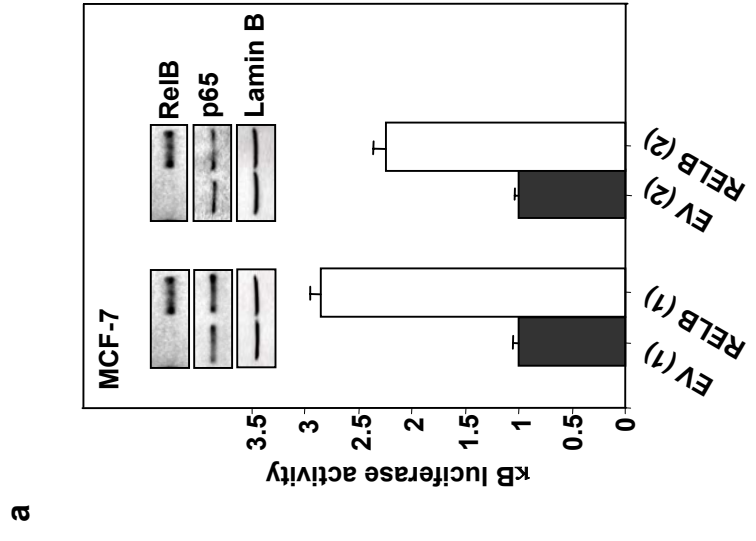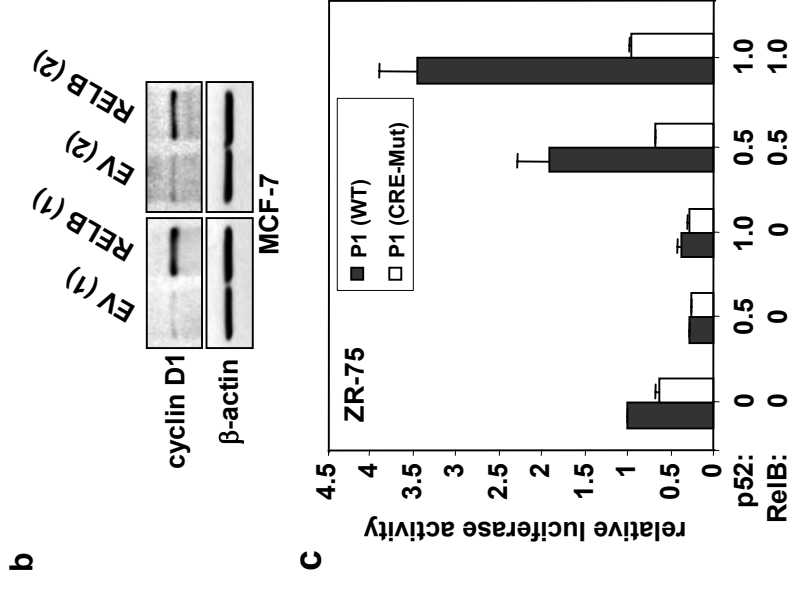

Fig S2. Wang et al.,

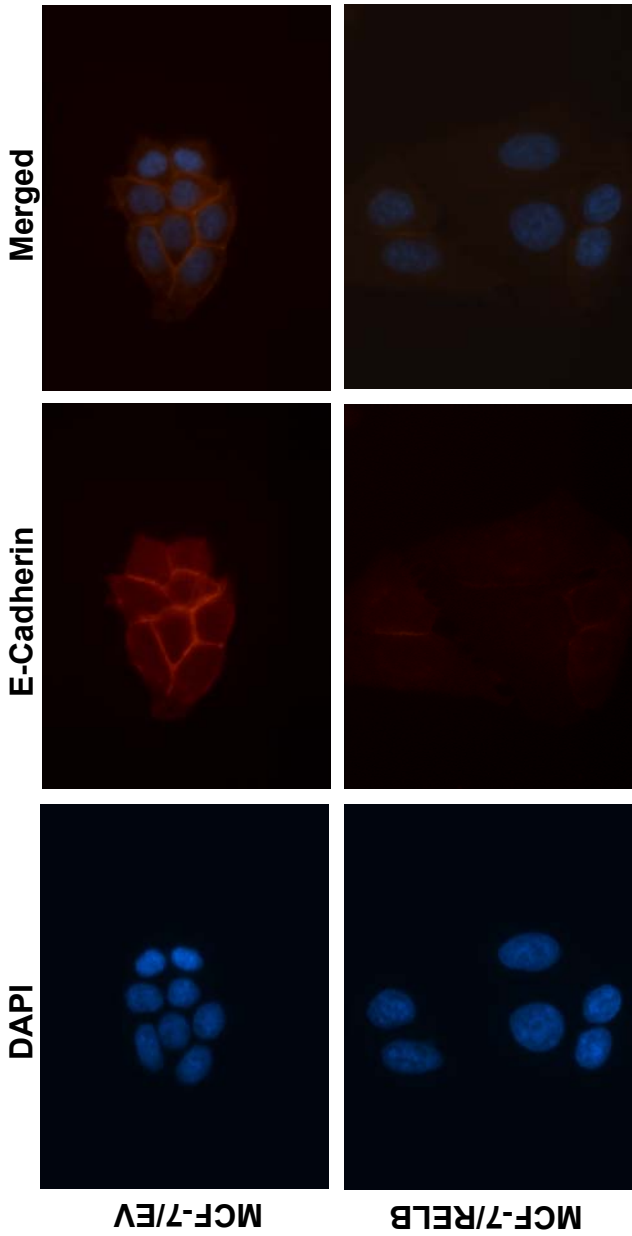

Fig. S3, Wang et al.,

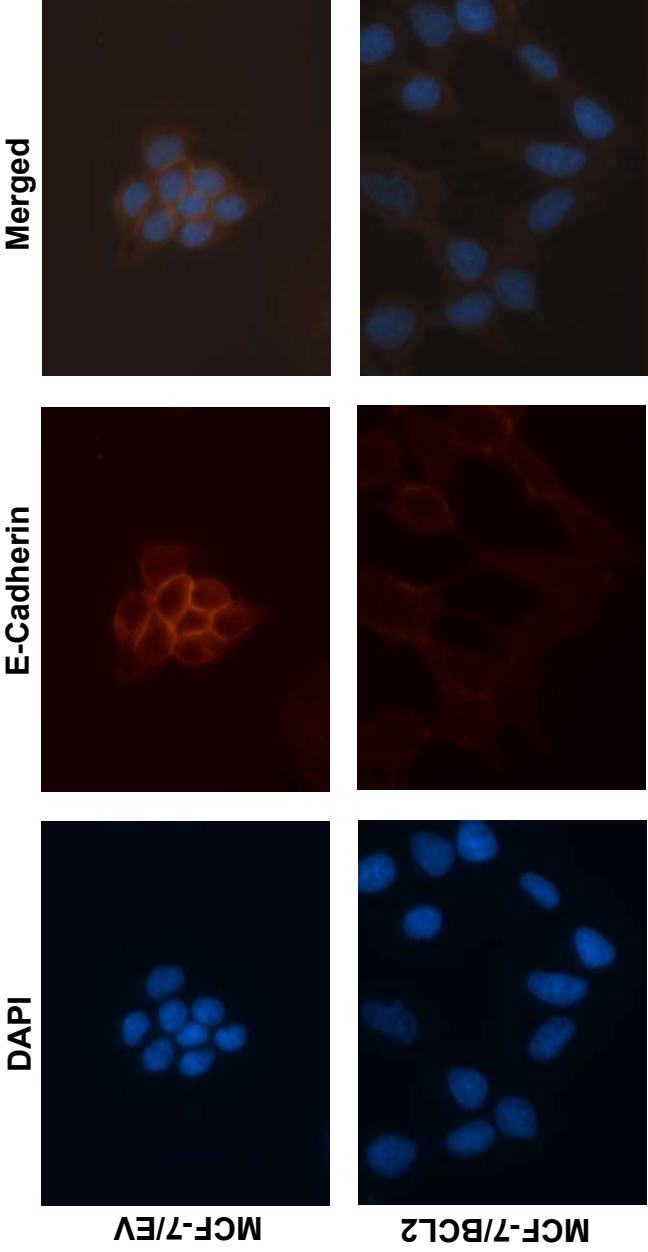

Fig. S4, Wang et al.,

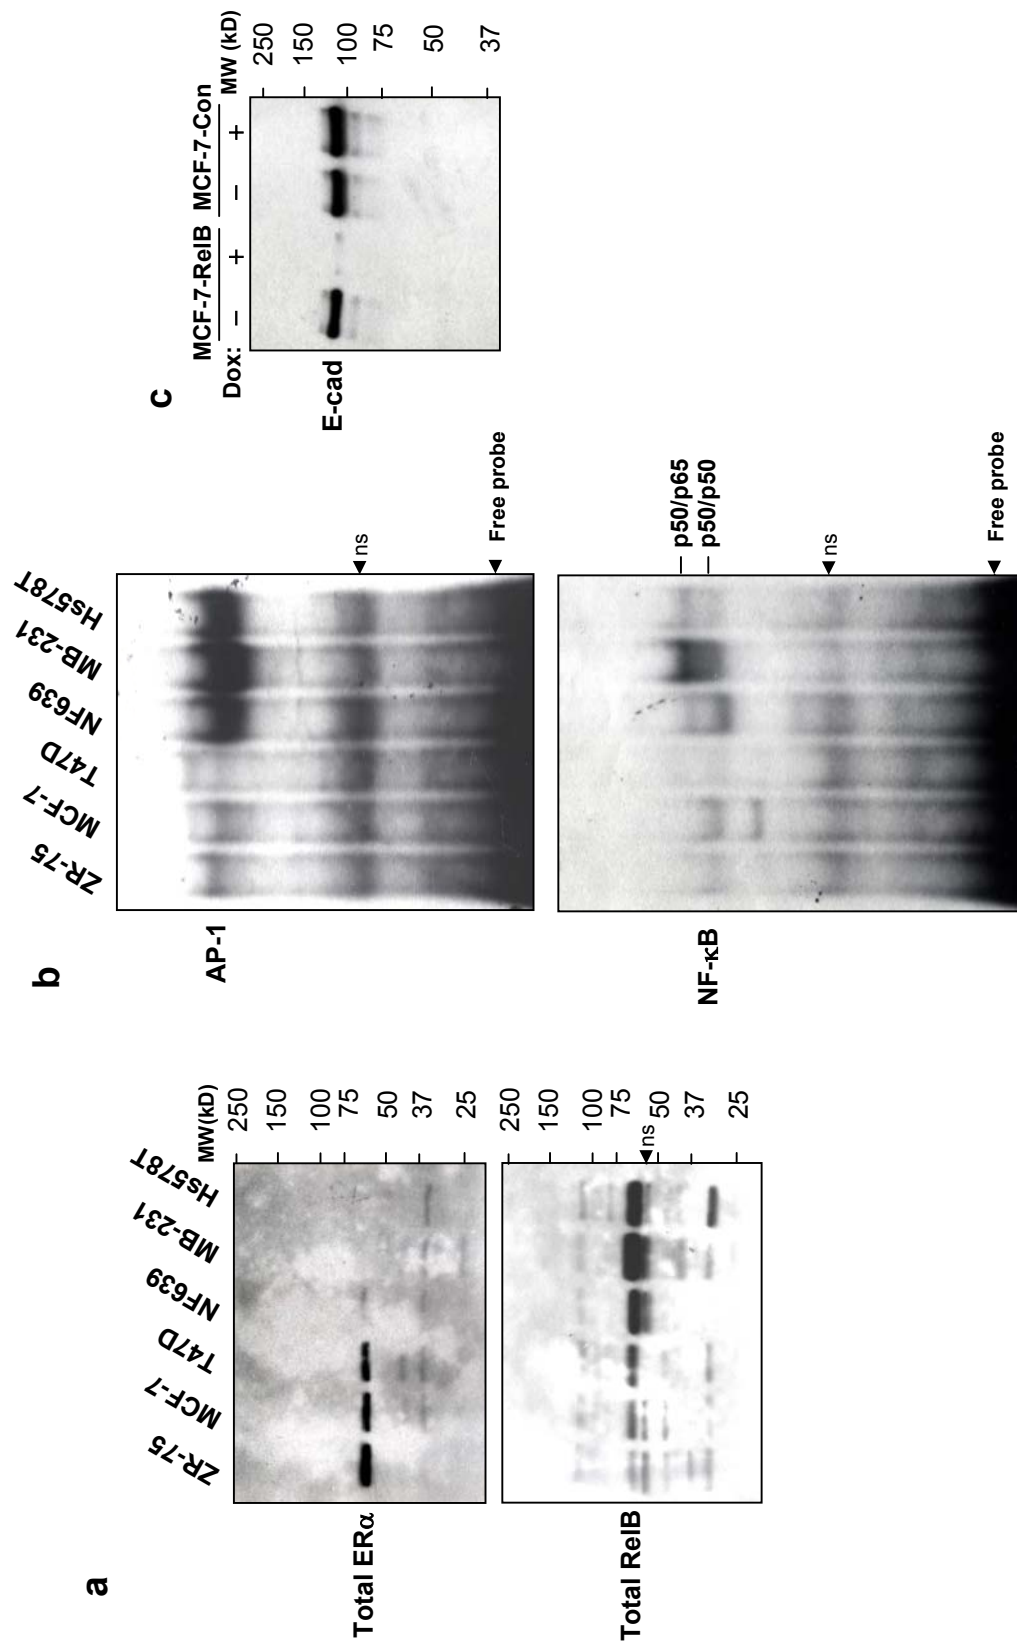

Fig. S5, Wang et al.
